# Supplementary material
Source: PubMed Central journal article supplement (PMC7254790)
Supplement: ao0c01034_si_001.pdf [file ao0c01034_si_001.pdf]

Supplementary Materials for

**N-Acetyl-L-cysteine enhances the effect of selenium nanoparticles on cancer cytotoxicity by increasing the production of selenium-induced reactive oxygen species**

Guangshan Zhao<sup>1#</sup>, Ruixia Dong<sup>2#</sup>, Jianyuan Teng<sup>1#</sup>, Lian Yang<sup>3</sup>, Tao Liu<sup>1</sup>, Ximing Wu<sup>4</sup>, Yufeng He<sup>4</sup>, Zhiping Wang<sup>3</sup>, Hanlin Pu<sup>1</sup>, Yifei Wang<sup>1\*</sup>

<sup>1</sup>Biology Postdoctoral Research Station; Guangzhou Jinan Biomedicine Research and Development Center, Institute of Biomedicine, College of Life Science and Technology, Jinan University, Guangzhou, Guangdong, PR China

<sup>2</sup>Department of Forestry and Technology, Lishui Vocational and Technical College, Lishui, Zhejiang, PR China

<sup>3</sup>Guangdong Provincial Engineering Center of Topical Precise Drug Delivery System, School of Pharmacy, Guangdong Pharmaceutical University, Guangzhou, Guangdong, PR China

<sup>4</sup>Laboratory of Redox Biology, State Key Laboratory of Tea Plant Biology and Utilization, School of Tea & Food Science, Anhui Agricultural University, Hefei, Anhui, PR China

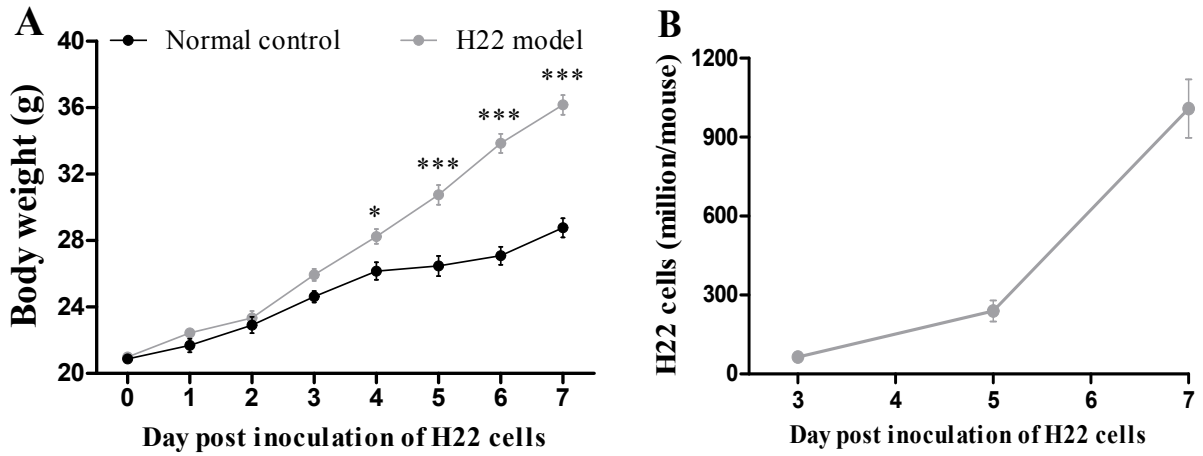

**Figure S1. Body weight and cancer cell number in peritoneal cavity of mice. Experiment.** To inspect the development of body weight and cancer cells in the mice peritoneal cavity post the inoculation, healthy mice were i.p. injected with saline as a control, or two millions of viable H22 cells as a moderate tumor model. **(A)** Body weight. **(B)** Viable cells. \*  $P < 0.05$ , \*\*\*  $P < 0.001$ , compared to control.

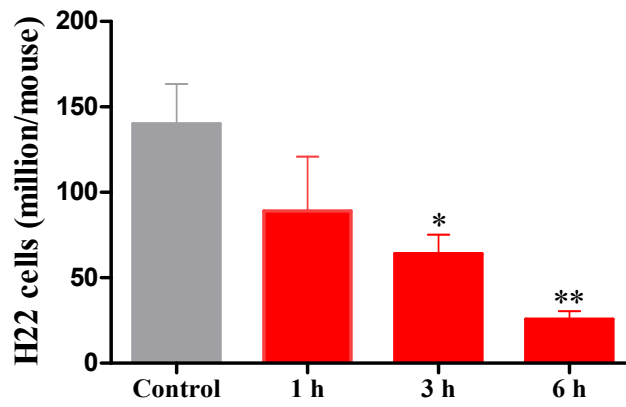

**Figure S2. Time effect of SeNP-triggered apoptosis of H22 cells in peritoneal cavity of mice.**  
**Experiment.** Highly malignant H22 model mice (n = 4/group) were i.p. injected with saline as control or SeNPs (4 mg Se/kg); mice were sacrificed at the indicated time post-injection, and cells were collected. Graph showing viable cells. Data are presented as the mean  $\pm$  SEM. \* P < 0.05, \*\* P < 0.01, compared to control.

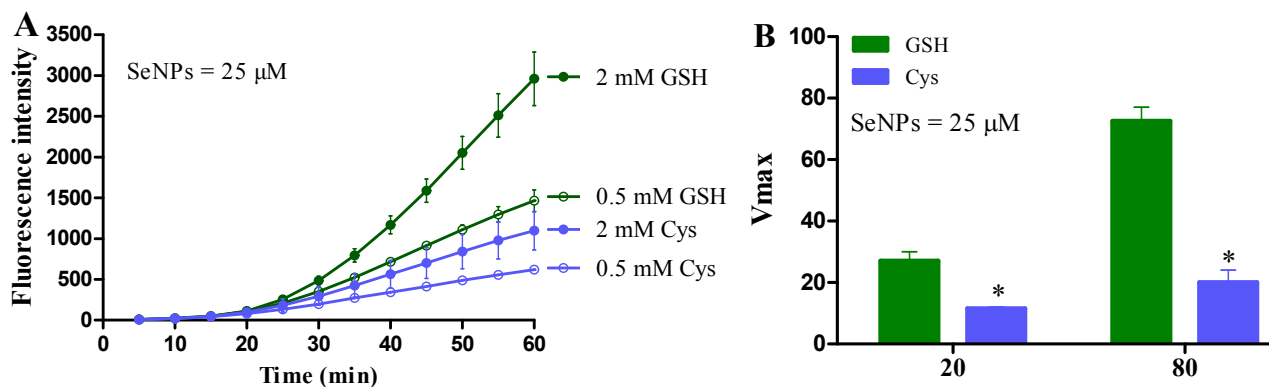

**Figure S3. Comparison between GSH and Cys in driving SeNPs to produce ROS at a molar ratio of 20 and 80 (GSH/Se or Cys/Se). (A) ROS production. (B) ROS formation kinetics.** Experiments were carried out in 50 mM PBS (1 mM EDTANa<sub>2</sub>, pH 7.5) at 37°C in the presence or absence of 50  $\mu$ M DCFH-DA. Data are presented as the mean of two replicates; the error bar represents the range. In most data points, the range was smaller than the symbol. The vehicle control has been subtracted from the treatments. \* P < 0.05, compared to GSH/SeNPs group.
